# Supplementary material for: A Lewis acidity adjustable organic ammonium cation derived robust protecting shield for stable aqueous zinc-ion batteries by inhibiting the tip effect
Source: Royal Society of Chemistry journal article supplement (doi:10.1039/d1qm01604k), 2022-01-01
Supplement: d1qm01604k5.pdf [file d1qm01604k5.pdf]

## Supporting Information

### **Lewis Acidity Adjustable Organic Ammonium Cation Derived Robust Protecting Shield for Stable Aqueous Zinc-ion Batteries by Inhibiting Tip Effect**

Siyi Qian<sup>a,+</sup>, Jinqiu Zhou<sup>a,+</sup>, Mingji Peng<sup>b</sup>, Yijun Qian<sup>c,\*</sup>, Yuan Meng<sup>a</sup>, Yuzhuo Jiang<sup>a</sup>, Xu Zeng<sup>a</sup>, Jie Liu<sup>a,\*</sup>, Tao Qian<sup>a,d\*</sup>, Chenglin Yan<sup>b,d</sup>

<sup>a</sup> School of Chemistry and Chemical Engineering, Nantong University, Nantong 226019, China

<sup>b</sup> Soochow Institute for Energy and Materials Innovations, College of Energy, Key Laboratory of Advanced Carbon Materials and Wearable Energy Technologies of Jiangsu Province, Soochow University, Suzhou 215006, China

<sup>c</sup> Institute for Frontier Materials, Deakin University, Geelong, Victoria 3220, Australia

<sup>d</sup> Light Industry Institute of Electrochemical Power Sources, Suzhou 215006, China

<sup>+</sup> The two authors contribute equally to this work.

\*E-mail: qiantao@ntu.edu.cn (T. Q).

\*E-mail: jliu93@ntu.edu.cn (J. L).

\*E-mail: qianyij@deakin.edu.au (Y. Q).

## Experimental section

### *Materials*

ZnSO<sub>4</sub>·7H<sub>2</sub>O (>99.0%), tetrabutylammonium chloride hydrate (≥98.0%) and tetramethylammonium chloride (≥98.0%) were purchased from Sigma-Aldrich Chemical Co. Tetraethylammonium chloride (>98.0%) was purchased from TCI Co. All reagents were used directly without further purification. All aqueous electrolytes used deionized water as the solvent.

### *Materials Characterizations*

The in-situ optical microscope (Caikon DMM-330C) was employed to observe the growth of zinc dendrites in symmetric Zn//Zn batteries. SEM images were collected on the GeminiSEM 300 with an accelerating voltage of 5 kV and it was employed to observe the morphology of anode surface in Zn//Cu batteries after 20 cycles.

### *Battery Assembly*

The Zn//Zn symmetrical battery which consists of two zinc sheets (Φ16 mm) and a glass fiber separator (Φ16 mm) with 100 μL electrolyte (2 M ZnSO<sub>4</sub> without/with 4 wt% additive) were sandwiched together in a CR2032 coin cell and crimped in the air. The Zn//Cu cell used for the CE test consists of a piece of Cu foil (Φ 12 mm), a Zn chip (Φ 16 mm) and a glass fiber separator (Φ 16 mm) with 100 μL electrolyte (2 M ZnSO<sub>4</sub> without/with 4 wt% additive). The cathode material which used in the full cell is a mixture of LiMnO<sub>2</sub> (LMO), super phosphorus and Teflon (dissolved in water) in a mass ratio of 7:2:1. The resulting mixture is cast onto a stainless steel mesh and pressed with a roller press at the pressure of 2.5 tons. And then the cathode material was dried at 80 °C for 12 hours in a vacuum oven. After drying, use a tablet press to cut them into 12 mm diameter pellets (each cathode pellet is loaded with ~1.5 mg cm<sup>-2</sup> LMO). The Zn//LMO full-cell is the CR2032 coin cell composed of a LMO cathode pellet (Φ12 mm), a zinc sheet (Φ16 mm), a glass fiber separator (Φ16 mm) with 100 μL electrolyte (2 M ZnSO<sub>4</sub> and 1 M Li<sub>2</sub>SO<sub>4</sub> without/with 4 wt% additive).

### *Electrochemical Tests*

Galvanostatic charge-discharge cycling tests of Zn//LMO full cells and CE tests of Zn//Cu cells are performed on the Neware BTS4000 battery test instrument. In addition, the polarization of the Zn//Zn symmetrical cell under different conditions was also performed in this battery test instrument. Cyclic voltammetry (CV) measurements of Zn//LiMnO<sub>2</sub> full cells were carried out on an electrochemical workstation of CHI660E at 1 mV s<sup>-1</sup>, and the voltage varied between 2.2 V and 1 V. The electrochemical

stability windows of the electrolytes without/with 4 wt% TEAC were tested by linear sweep voltammetry experiments at  $1 \text{ mV s}^{-1}$  with a typical three-electrode system, where platinum wire serves as working and counter electrodes, Ag/AgCl serves as reference electrode. Corresponding electrochemical impedance spectroscopy (EIS) studies also performed on the electrochemical workstation of CHI660E, and the frequency varied from  $10^6 \text{ Hz}$  to  $10^{-3} \text{ Hz}$  with an amplitude of 5 mV. The Tafel curves of Zn symmetric cells in different electrolytes were carried out on the workstation by the technique of Tafel Plot, and the voltage ranged from  $-1.04 \text{ V}$  to  $-0.87 \text{ V}$ .

#### *DFT computational method*

The Spin-polarized DFT calculation using the Vienna ab initio simulation package (VASP) was adopted to simulate ionic binding capacity including  $\text{Zn}^{2+}$ ,  $\text{TMA}^+$ ,  $\text{TEA}^+$  and  $\text{TBA}^+$  in the Zn-111 Surface. The Perdew–Burke–Ernzerhof with generalized gradient approximation (GGA) was adopted to describe the electron–electron interaction. An energy cutoff of 450 eV was used, and a k-point sampling set of  $3 \times 3 \times 1$  was tested to be converged. The criterion for all structural optimizations was set to  $10^{-5} \text{ eV}$  for electronic energy convergence and Hellmann–Feynman force less than  $0.02 \text{ eV \AA}^{-1}$  for ionic relaxation loop. The vacuum space along the z-direction is set to be 15 Å. To account for the strong on-site coulombic interaction of localized d electrons, the Hubbard-like term ( $U_{\text{Zn}} = 3.5 \text{ eV}$ ) was added into the DFT calculation. The van der Waals dispersion forces and solvation effects in aqueous solution were included using the zero damping DFT-D3 method of Grimme and Poisson-Boltzmann implicit solvation model as implemented in VASPSOL. The visualization for electronic and structural analysis (VESTA) was used to straightforwardly visualize the charge distribution of each model.

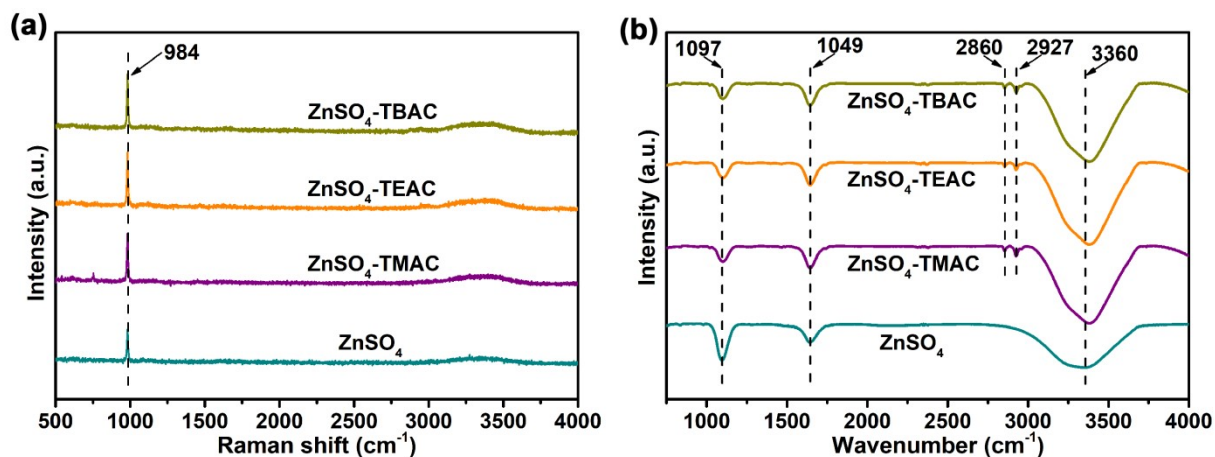

**Figure S1.** (a) Raman and (b) FTIR spectra of different electrolytes.

As shown in Fig. S1a, the symmetric stretching band (984 cm<sup>-1</sup>) of SO<sub>4</sub><sup>2-</sup> could be detected, and this could be also confirmed by FTIR spectrum of different electrolytes in Fig. S1b.<sup>S1</sup> The absorption peaks at 1049 cm<sup>-1</sup> and 1097 cm<sup>-1</sup> were attributed to the triply degenerate vibrations of SO<sub>4</sub><sup>2-</sup>.<sup>S2</sup> New absorption peaks at 2860 cm<sup>-1</sup> and 2927 cm<sup>-1</sup> were introduced due to the addition of additives, which were dominated by strong C–H bond stretching vibrations of organic ammonium cations.<sup>S3</sup> Furthermore, the blue shift of the peak at 3360 cm<sup>-1</sup> (O–H stretching) indicated that the addition of additives has changed the solvation structure, confirming the effect of added organic ammonium cations on the electrolytes.<sup>S4</sup>

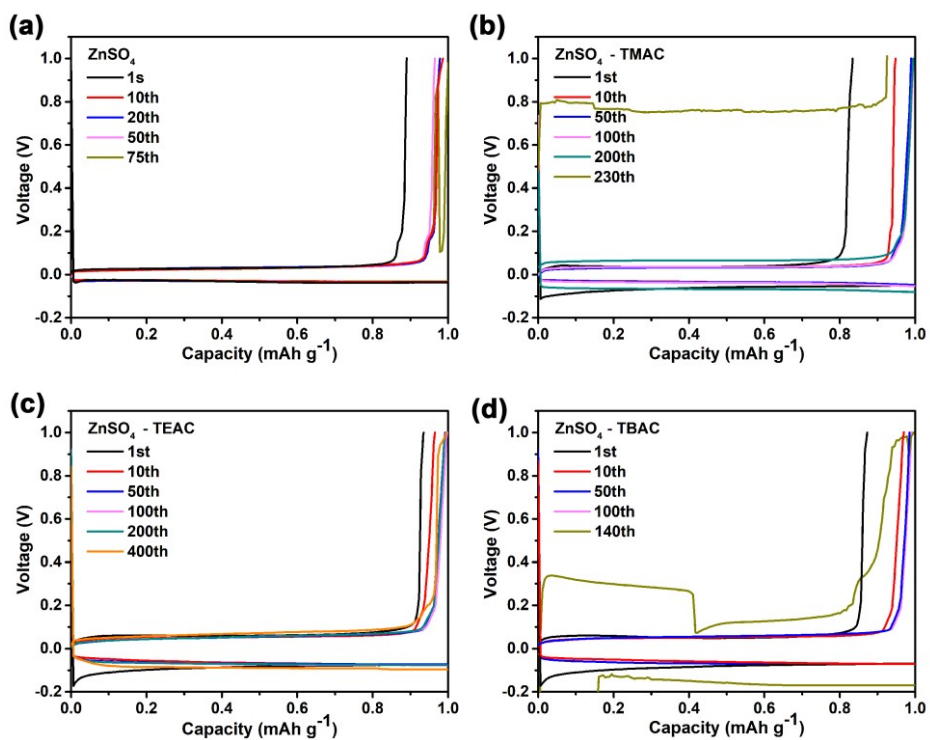

**Figure S2.** Charge/discharge curves of Zn//Cu cells in different electrolyte obtained from Fig. 2a.

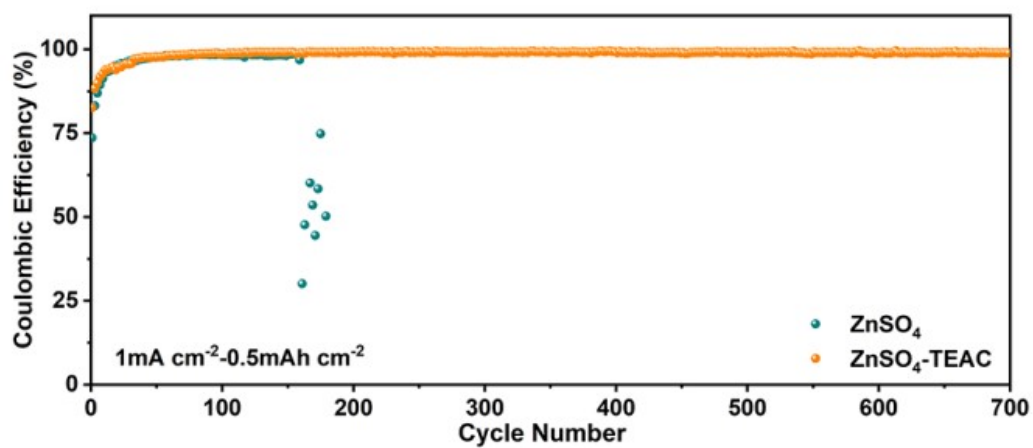

**Figure S3.** Coulombic efficiency of Zn//Cu coin cells with/without TEA<sup>+</sup> in the electrolytes at 1 mA cm<sup>-2</sup> and 0.5 mAh cm<sup>-2</sup>.

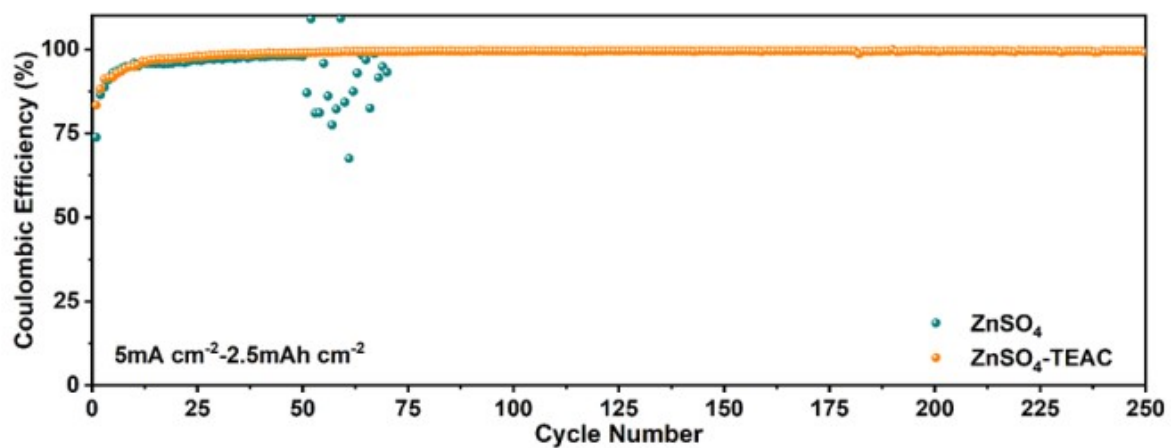

**Figure S4.** Coulombic efficiency of Zn//Cu coin cells with/without TEA<sup>+</sup> in the electrolytes at 5 mA cm<sup>-2</sup> and 2.5 mAh cm<sup>-2</sup>.

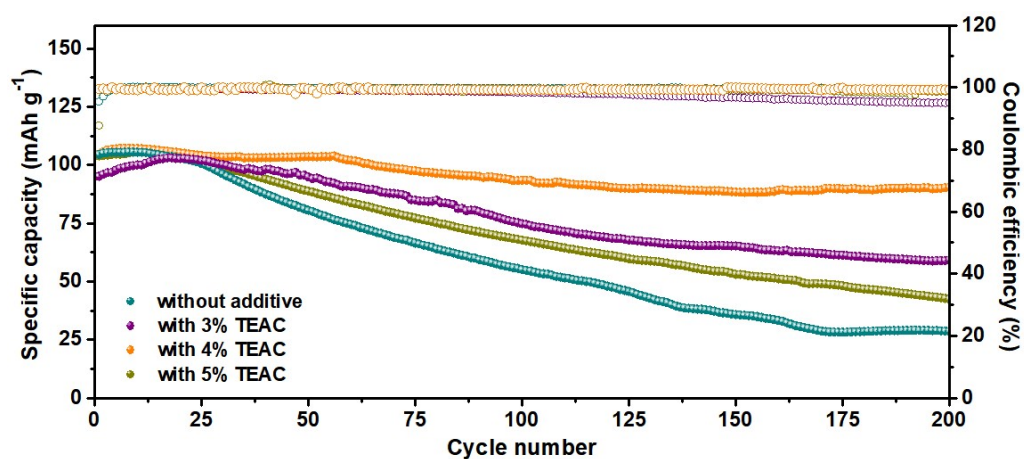

**Figure S5.** Cycling stability and efficiency of Zn//LiMnO<sub>2</sub> cells in electrolytes with different contents of TEAC additive at 2 C.

To explore the most suitable additive content, at the rate of 2 C, we tested the long-term cycling stability of Zn//LiMnO<sub>2</sub> batteries with different contents of TEAC additive in the electrolyte (Fig. S5). In the electrolyte with 4 wt% TEAC, the stability of Zn//LiMnO<sub>2</sub> battery was improved to the greatest extent.



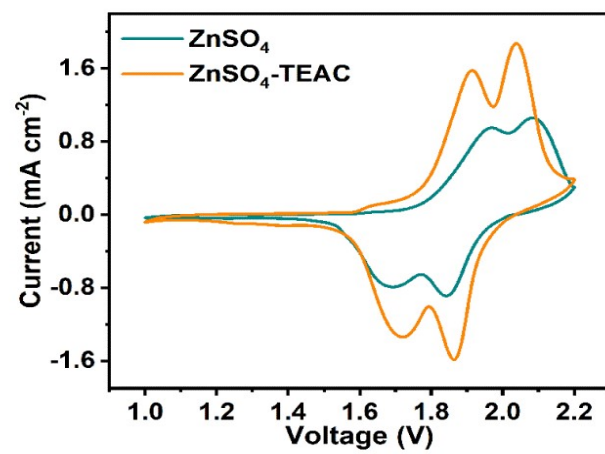

**Figure S6.** CV tests of Zn//LiMnO<sub>2</sub> full cells in the electrolyte without/with TEAC additive.

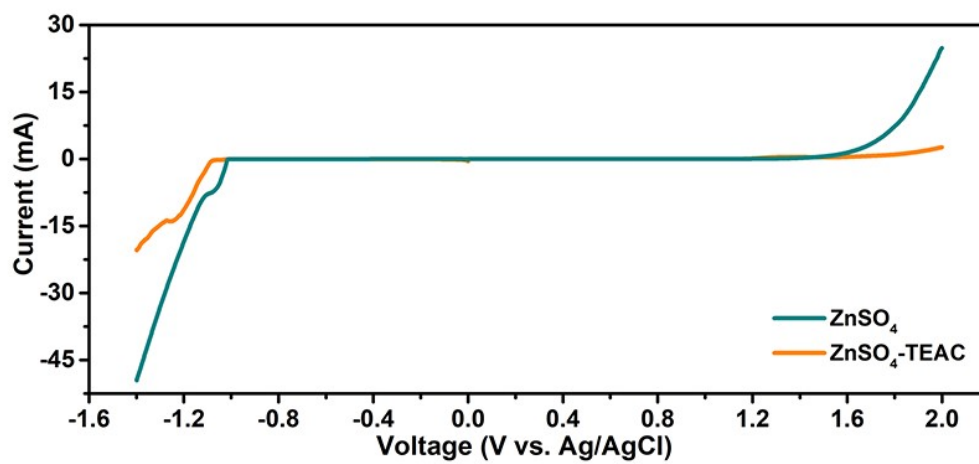

**Figure S7.** The electrochemical stability windows of the electrolyte without/with TEAC additive.

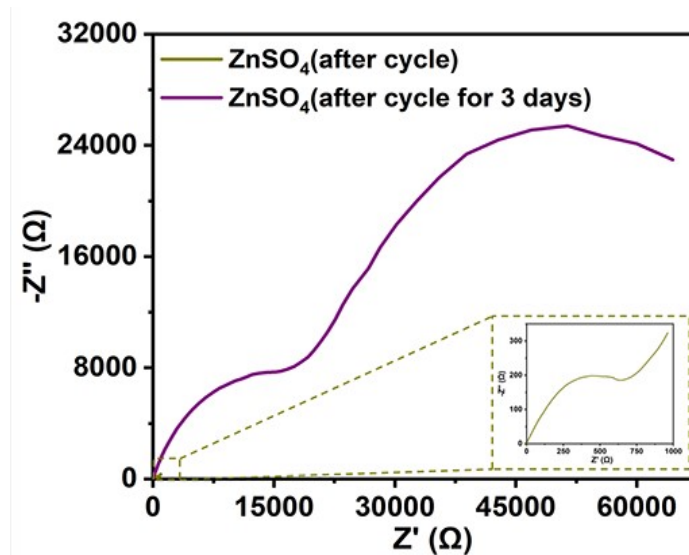

**Figure S8.** EIS curves of the Zn//Zn symmetric cell in the ZnSO<sub>4</sub> electrolyte after 20 cycles and after 20 cycles for 3 days.

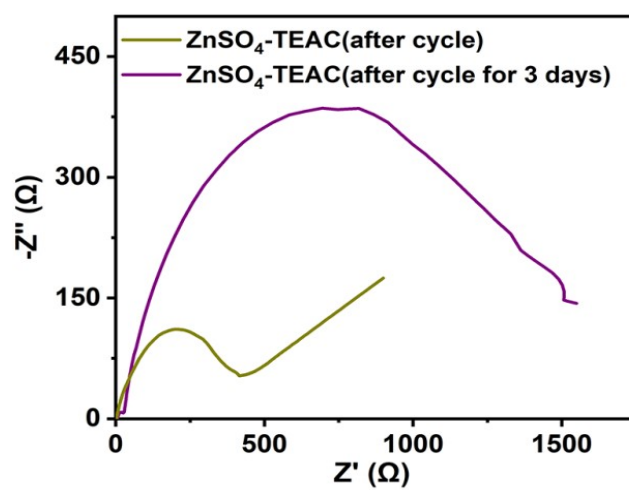

**Figure S9.** EIS curves of the Zn//Zn symmetric cell in the ZnSO<sub>4</sub>-TEAC electrolyte after 20 cycles and after 20 cycles for 3 days.

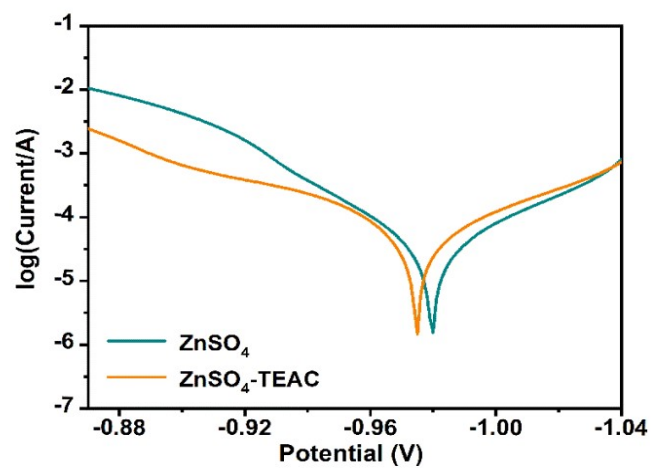

**Figure S10.** Tafel curves of Zn symmetric cell in the electrolyte without/with TEAC additive.

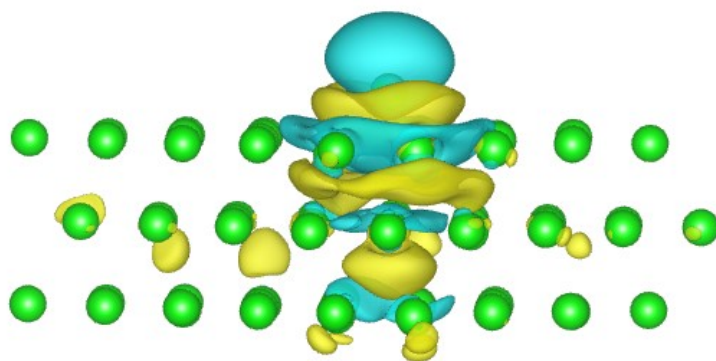

**Figure S11.** Differential charge density of  $\text{Zn}^{2+}$  on a Zn surface. The zinc ion, hydrogen, zinc atoms are marked as blue, yellow and green, respectively.

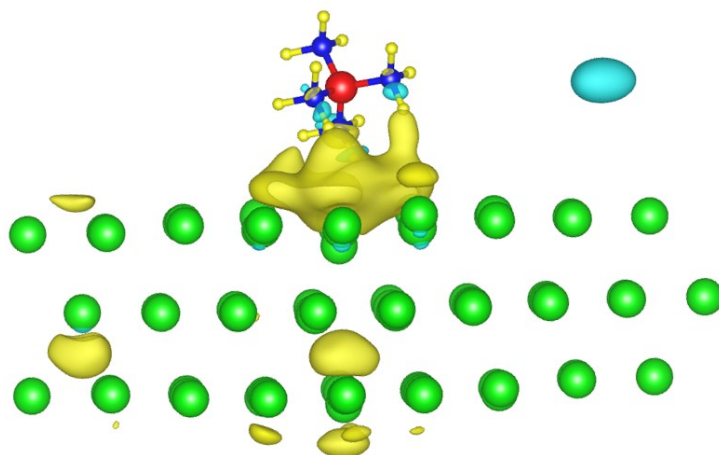

**Figure S12.** Differential charge density of TMA<sup>+</sup> on a Zn surface. The zinc ion, hydrogen, zinc, carbon and nitrogen atoms are marked as blue, yellow, green, purple and red, respectively.

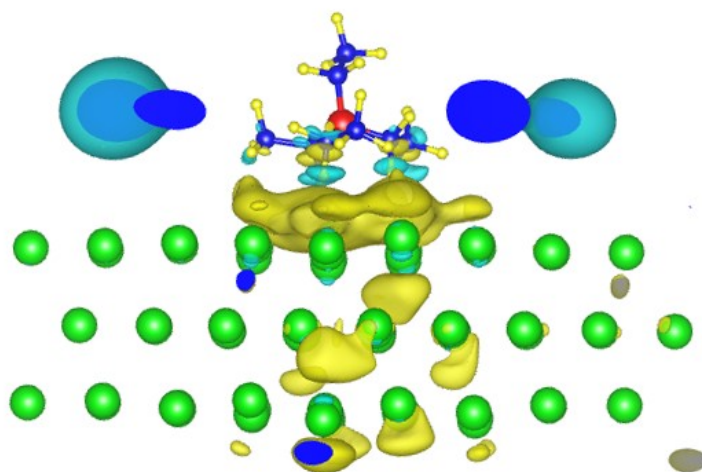

**Figure S13.** Differential charge density of TEA<sup>+</sup> on a Zn surface. The zinc ion, hydrogen, zinc, carbon and nitrogen atoms are marked as blue, yellow, green, purple and red, respectively.



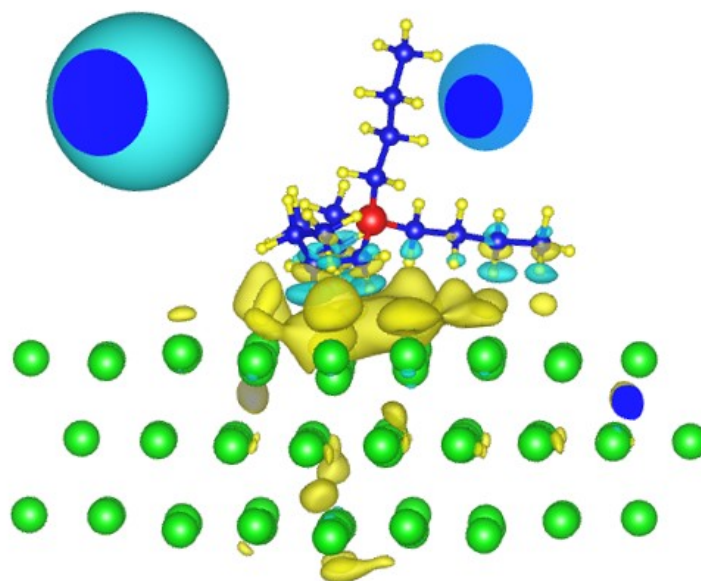

**Figure S14.** Differential charge density of TBA<sup>+</sup> on a Zn surface. The zinc ion, hydrogen, zinc, carbon and nitrogen atoms are marked as blue, yellow, green, purple and red, respectively.

## References

- S1 W. Wolfram, M. Rudolph and P. Brooker, Raman spectroscopy of aqueous ZnSO<sub>4</sub> solutions under hydrothermal conditions: solubility, hydrolysis, and sulfate ion pairing. *J. Solution Chem.*, 1999, **28**, 621–630.
- S2 M. Rahman and J. Podder, Enhanced metastable zone width and optical properties of KCl doped ZnSO<sub>4</sub>·7H<sub>2</sub>O crystal grown by isothermal evaporation technique. *Bangladesh J. Sci. Res.*, 2020, **2**, 88–95.
- S3 M. Sawicka, P. Storoniak, J. B a e jowski and J. Rak, TG-FTIR, DSC, and quantum-chemical studies on the thermal decomposition of quaternary ethylammonium halides. *J. Phys. Chem. A*, 2006, **110**, 5066–5074.
- S4 Y. Zhu, J. Yin, X. Zheng, A. Emwas, Y. Lei, O. Mohammed, Y. Cui and H. Alshareef, Concentrated dual-cation electrolyte strategy for aqueous zinc-ion batteries. *Energy & Environ. Sci.*, 2021, **14**, 4463–4473.
